# Supplementary material for: Identification and characterization of new proteins crucial for bacterial spore resistance and germination
Source: PubMed Central journal article supplement (PMC10126465; doi:10.3389/fmicb.2023.1161604), 2023-04-11
Supplement: Data_Sheet_1.pdf [file Data_Sheet_1.pdf]

## **Supplementary Information**

### **Identification and Characterization of New Proteins Crucial for Bacterial Spore Resistance and Germination**

Benjamin Yu<sup>1</sup>, Julia Kanaan<sup>1</sup>, Hannah Shames<sup>1</sup>, James Wicander<sup>1</sup>, Makunda Aryal<sup>2</sup>, Yunfeng Li<sup>1</sup>, George Korza<sup>1</sup>, Stanley Brul<sup>3</sup>, Gertjan Kramer<sup>4</sup>, Yong-qing, Li<sup>2</sup>, Frank C. Nichols<sup>5</sup>, Bing Hao<sup>1</sup> and Peter Setlow\*<sup>1</sup>

<sup>1</sup>Department of Molecular Biology and Biophysics, and <sup>5</sup>Division of Periodontology, UConn Health, Farmington, CT 06030-3305, USA; <sup>2</sup>Department of Physics, East Carolina University, Greenville, NC 27858-4353, USA; <sup>4</sup>Molecular Biology & Microbial Food Safety and Laboratory for Mass Spectrometry of Biomolecules, Swammerdam Institute for Life Science, University of Amsterdam, 1098XH Amsterdam, The Netherlands

## **Supplementary Information List**

1. Supplementary Table S1
2. Supplementary Table S2
3. Supplementary Table S3
4. Supplementary Table S4
5. Supplementary Figure S1
6. Supplementary Figure S2
7. Supplementary Figure S3
8. Supplementary Figure S4
9. Supplementary Figure S5
10. Supplementary Figure S6
11. Supplementary Figure S7

**Supplementary Table S1 Average parameters of the germination of multiple individual wt and *yetF* spores**

| Spores               | PS832           |                 | PS4488          |                 |
|----------------------|-----------------|-----------------|-----------------|-----------------|
|                      | Valine          | AGFK            | Valine          | AGFK            |
| $T_{lag}$            | $20.3 \pm 8.9$  | $36.5 \pm 16.6$ | $44.6 \pm 23.1$ | $49.0 \pm 20.5$ |
| $T_{release}$        | $24.0 \pm 9.4$  | $40.3 \pm 16.9$ | $48.2 \pm 23.0$ | $53.8 \pm 20.9$ |
| $T_{lys}$            | $34.7 \pm 9.2$  | $52.0 \pm 16.7$ | $63.6 \pm 17.6$ | $74.5 \pm 11.5$ |
| $\Delta T_{release}$ | $3.7 \pm 1.4$   | $3.8 \pm 1.1$   | $3.6 \pm 1.2$   | $4.8 \pm 1.6$   |
| $\Delta T_{lys}$     | $10.7 \pm 2.8$  | $11.7 \pm 4.7$  | $15.4 \pm 8.0$  | $20.7 \pm 11.5$ |
| $I_{lag}$            | $0.88 \pm 0.07$ | $0.83 \pm 0.06$ | $0.77 \pm 0.07$ | $0.76 \pm 0.09$ |
| $I_{release}$        | $0.21 \pm 0.05$ | $0.29 \pm 0.07$ | $0.29 \pm 0.07$ | $0.23 \pm 0.07$ |
| ger/num†             | 97/139          | 80/104          | 44/133          | 14/40           |

Spores were germinated and individual germination parameters were measured as described in Methods. †Number of spores that germinated/number of spores examined.

**Supplementary Table S2** Homologs of *B. subtilis yetF* or *2Duf* in completed genomes of *Bacilli*.

| <i>Bacilli</i> spore forming species                   | Number of homologs to |             | Asporogenous <i>Bacilli</i> species  | Number of homologs to |             |
|--------------------------------------------------------|-----------------------|-------------|--------------------------------------|-----------------------|-------------|
|                                                        | <i>yetF</i>           | <i>2duf</i> |                                      | <i>yetF</i>           | <i>2duf</i> |
| <i>Aeribacillus pallidus</i>                           | 1                     | 1           | <i>Aerococcaceae bacterium</i>       | 1                     | 0           |
| <i>Alicyclobacillus acidocaldarius</i>                 | 0                     | 1           | <i>Auricoccus indicus</i>            | 1                     | 0           |
| <i>Amphibacillus xylanus</i>                           | 2                     | 0           | <i>Brochothrix thermosphacta</i>     | 1                     | 0           |
| <i>Aneurinibacillus soli</i>                           | 0                     | 1           | <i>Carnobacterium maltaromaticum</i> | 1                     | 0           |
| <i>Anoxyacillus flavithermus</i>                       | 2                     | 1           | <i>Enterococcus faecalis</i>         | 1                     | 0           |
| <i>Bacillus amyloliquefaciens</i>                      | 1                     | 0           | <i>Gemella haemolysans</i>           | 1                     | 0           |
| <i>Bacillus anthracis</i>                              | 3                     | 1           | <i>Jeotgalibaca dankookensis</i>     | 2                     | 0           |
| <i>Bacillus atrophaeus</i>                             | 1                     | 0           | <i>Lactobacillus acidophilus</i>     | 1                     | 0           |
| <i>Bacillus cereus</i>                                 | 5                     | 1           | <i>Lactobacillus plantarum</i>       | 1                     | 0           |
| <i>Bacillus firmus</i>                                 | 1                     | 0           | <i>Lactobacillus reuteri_</i>        | 1                     | 0           |
| <i>Bacillus halodurans</i>                             | 8                     | 2           | <i>Lactobacillus rhamnosus</i>       | 1                     | 0           |
| <i>Bacillus licheniformis</i>                          | 6                     | 0           | <i>Lactococcus lactis</i>            | 1                     | 0           |
| <i>Bacillus megaterium</i>                             | 1                     | 0           | <i>Leuconostoc kimchii</i>           | 1                     | 0           |
| <i>Bacillus pumilus</i>                                | 1                     | 0           | <i>Marinilactibacillus 15R</i>       | 1                     | 0           |
| <i>Bacillus subtilis</i>                               | 5                     | 0           | <i>Melissococcus plutonius</i>       | 1                     | 0           |
| <i>Bacillus thuringiensis</i>                          | 5                     | 1           | <i>Planococcus antarcticus</i>       | 1                     | 0           |
| <i>Bacillus weihenstephanensis</i>                     | 1                     | 0           | <i>Salimicrobium jeotgali</i>        | 1                     | 0           |
| <i>Brevibacillus brevis</i>                            | 4                     | 1           | <i>Salinicoccus halodurans</i>       | 2                     | 0           |
| <i>Cohnella candidum</i>                               | 5                     | 1           | <i>Streptococcus mutans GS-5</i>     | 1                     | 0           |
| <i>Fictibacillus phosphorivorans</i>                   | 6                     | 0           | <i>Streptococcus pneumoniae</i>      | 1                     | 0           |
| <i>Geobacillus kaustophilus</i>                        | 0                     | 1           | <i>Vagococcus penaei</i>             | 1                     | 0           |
| <i>Geobacillus stearothermophilus</i>                  | 1                     | 0           |                                      |                       |             |
| <i>Halobacillus halophilus</i>                         | 6                     | 1           |                                      |                       |             |
| <i>Kyrpidia tusciae</i>                                | 0                     | 2           |                                      |                       |             |
| <i>Laceyella sacchari</i>                              | 1                     | 1           |                                      |                       |             |
| <i>Lentibacillus amyloliquefaciens</i>                 | 3                     | 1           |                                      |                       |             |
| <i>Lysinibacillus sphaericus</i>                       | 4                     | 0           |                                      |                       |             |
| <i>Novibacillus thermophilus</i>                       | 3                     | 0           |                                      |                       |             |
| <i>Oceanobacillus iheyensis</i>                        | 2                     | 1           |                                      |                       |             |
| <i>Paenibacillus polymyxa</i>                          | 2                     | 1           |                                      |                       |             |
| <i>Paenisporosarcina cavernae</i>                      | 3                     | 0           |                                      |                       |             |
| <i>Parageobacillus thermoglucosidasius</i>             | 1                     | 1           |                                      |                       |             |
| <i>Paraliobacillus zengyii</i>                         | 8                     | 0           |                                      |                       |             |
| <i>Solibacillus silvestris</i>                         | 4                     | 0           |                                      |                       |             |
| <i>Sporolactobacillus terrae</i>                       | 5                     | 0           |                                      |                       |             |
| <i>Sporosarcina psychrophila</i>                       | 3                     | 0           |                                      |                       |             |
| <i>Terribacillus goriensis</i>                         | 4                     | 0           |                                      |                       |             |
| <i>Thermobacillus composti</i>                         | 2                     | 0           |                                      |                       |             |
| <i>Virgibacillus halodenitrificans</i>                 | 3                     | 2           |                                      |                       |             |
| <b>Average number in ones with <math>\geq 1</math></b> | <b>3.2</b>            | <b>1</b>    | <b>Average number per species</b>    | <b>1.1</b>            | <b>0</b>    |

**Supplementary Table S3 Homologs of *B. subtilis* yetF/2Duf in *Clostridia* genomes.**

| <i>Clostridia</i> spore formers                        | Number of homologs to |             | Likely <i>Clostridia</i> spore formers<br>(have <i>gpr</i> , <i>spoVFA</i> , <i>spoVFB</i> ) | Number of homologs to |             |
|--------------------------------------------------------|-----------------------|-------------|----------------------------------------------------------------------------------------------|-----------------------|-------------|
|                                                        | <i>yetF</i>           | <i>2duf</i> |                                                                                              | <i>yetF</i>           | <i>2duf</i> |
| <i>Alkaliphilus metalliredigens</i>                    | 3                     | 1           | <i>Acetohalobium arabaticum</i>                                                              | 5                     | 0           |
| <i>Ammonifex degensii</i>                              | 2                     | 0           | <i>Anoxybacter fermentans</i>                                                                | 2                     | 0           |
| <i>Caldanaerobacter subterraneus</i>                   | 1                     | 0           | <i>Caldicellulosiruptor saccharolyticus</i>                                                  | 1                     | 0           |
| <i>Candidatus Arthromitus</i> sp. <i>SFB-mouse</i>     | 1                     | 0           | <i>Carboxydocella thermautotrophica</i>                                                      | 2                     | 0           |
| <i>Candidatus Desulforudis audaxviator</i>             | 1                     | 0           | <i>Ethanoligenens harbinense</i>                                                             | 4                     | 0           |
| <i>Caproiciproducens</i> sp. <i>NJN-50</i>             | 2                     | 0           | <i>Faecalibacterium prausnitzii</i>                                                          | 1                     | 0           |
| <i>Cellulosilyticum lentocellum</i>                    | 1                     | 0           | <i>Flavonifractor plautii</i>                                                                | 1                     | 0           |
| <i>Clostridioides difficile</i> _                      | 1                     | 0           | <i>Halobacteroides halobius</i>                                                              | 6                     | 0           |
| <i>Clostridium acetobutylicum</i>                      | 5                     | 0           | <i>Halocella</i> sp. <i>SP3-1</i>                                                            | 5                     | 0           |
| <i>Clostridium botulinum</i>                           | 2                     | 0           | <i>Halothermothrix orenii</i>                                                                | 6                     | 0           |
| <i>Clostridium perfringens</i>                         | 1                     | 0           | <i>Herbinix luporum</i>                                                                      | 2                     | 0           |
| <i>Clostridium tetani</i>                              | 2                     | 0           | <i>Natranaerobius thermophilus</i>                                                           | 2                     | 0           |
| <i>Dehalobacterium formicoaceticum</i>                 | 1                     | 1           | <i>Pelotomaculum thermopropionicum</i>                                                       | 2                     | 0           |
| <i>Desulfallas gibsoniae</i>                           | 2                     | 1           | <i>Ruminococcus albus</i>                                                                    | 1                     | 0           |
| <i>Desulfitobacterium hafniense</i>                    | 3                     | 0           | <i>Syntrophomonas wolfei</i>                                                                 | 3                     | 0           |
| <i>Desulfofarcimen acetoxidans</i>                     | 3                     | 0           | <i>Syntrophothermus lipocalidus</i>                                                          | 2                     | 0           |
| <i>Desulfofundulus kuznetsovii</i>                     | 2                     | 0           | <i>Thermincola potens</i>                                                                    | 3                     | 0           |
| <i>Desulfosporosinus orientis</i>                      | 2                     | 1           | <b>Average number in ones with <math>\geq 1</math></b>                                       | <b>2.8</b>            | <b>0</b>    |
| <i>Desulfotomaculum ruminis</i>                        | 3                     | 1           |                                                                                              |                       |             |
| <i>Hungateiclostridium thermocellum</i>                | 1                     | 0           | <i>Asporogenous Clostridia species</i>                                                       |                       |             |
| <i>Intestinimonas butyriciproducens</i>                | 1                     | 0           | <i>Aminipila</i> sp. <i>JN-39</i>                                                            | 1                     | 0           |
| <i>Lachnoanaerobaculum umeaense</i>                    | 2                     | 0           | <i>Carboxydotherrmus hydrogenoformans</i>                                                    | 1                     | 0           |
| <i>Lachnoclostridium phytofermentans</i>               | 1                     | 0           | <i>Dehalobacter</i> sp. <i>CF</i>                                                            | 1                     | 0           |
| <i>Mahella australiensis</i>                           | 1                     | 0           | <i>Thermosediminibacter oceani</i>                                                           | 1                     | 0           |
| <i>Moorella thermoacetica</i>                          | 1                     | 0           | <b>Average number per species</b>                                                            | <b>1</b>              | <b>0</b>    |
| <i>Paeniclostridium sordellii</i>                      | 2                     | 0           |                                                                                              |                       |             |
| <i>Pseudoclostridium thermosuccinogenes</i>            | 1                     | 1           |                                                                                              |                       |             |
| <i>Ruminiclostridium cellulolyticum</i>                | 3                     | 0           |                                                                                              |                       |             |
| <i>Symbiobacterium thermophilum</i>                    | 2                     | 0           |                                                                                              |                       |             |
| <i>Syntrophobotulus glycolicus</i>                     | 1                     | 0           |                                                                                              |                       |             |
| <i>Tepidanaerobacter acetatoxydans</i>                 | 1                     | 0           |                                                                                              |                       |             |
| <i>Thermacetogenium phaeum</i>                         | 2                     | 0           |                                                                                              |                       |             |
| <i>Thermoanaerobacter italicus</i>                     | 1                     | 0           |                                                                                              |                       |             |
| <i>Thermoclostridium stercorarium</i>                  | 1                     | 0           |                                                                                              |                       |             |
| <b>Average number in ones with <math>\geq 1</math></b> | <b>1.6</b>            | <b>1</b>    |                                                                                              |                       |             |

**Supplementary Table S4** Sequence identity between 2Duf homologs in *Bacilli* and *Clostridia* and 2Duf encoded in *spoVA*<sup>2mob</sup>.

| <i>Bacilli</i>                              | NCBI ID        | Identity to 2Duf (%) |
|---------------------------------------------|----------------|----------------------|
| <b>Group 1</b>                              |                |                      |
| <i>Aeribacillus pallidus</i>                | WP_066246610.1 | 55.2                 |
| <i>Aneurinibacillus soli</i>                | WP_096463052.1 | 50.9                 |
| <i>Anoxyacillus flavithermus</i>            | WP_012575624.  | 55.1                 |
| <i>Bacillus anthracis</i>                   | WP_000018934   | 59.1                 |
| <i>Bacillus cereus</i>                      | WP_000018922.1 | 60.5                 |
| <i>Bacillus halodurans</i>                  | WP_010897735.1 | 30.5                 |
| <i>Bacillus thuringiensis</i>               | WP_000018924.1 | 60.8                 |
| <i>Brevibacillus brevis</i>                 | WP_015892354.1 | 52.4                 |
| <i>Cohnella candidum</i>                    | WP_123042938.1 | 53.1                 |
| <i>Geobacillus kaustophilus</i>             | WP_011230358   | 54.5                 |
| <i>Halobacillus halophilus</i>              | WP_014642772.1 | 57.3                 |
| <i>Lentibacillus amyloliquefaciens</i>      | WP_068440573.1 | 55.1                 |
| <i>Oceanobacillus iheyensis</i>             | WP_011065783.1 | 50.9                 |
| <i>Parageobacillus thermoglucosidasius</i>  | WP_003252282.1 | 55.6                 |
| <i>Virgibacillus halodenitrificans</i>      | WP_019376107.1 | 59.6                 |
| <b>Group 2</b>                              |                |                      |
| <i>Alicyclobacillus acidocaldarius</i>      | WP_041694969   | 48.6                 |
| <i>Kyrpidia tusciae</i>                     | WP_013075904.1 | 38.1                 |
| <i>Laceyella sacchari</i>                   | WP_102991708.1 | 47.9                 |
| <b>Group 3</b>                              |                |                      |
| <i>Paenibacillus polymyxa</i>               | WP_013370894.1 | 39.9                 |
| <i>Clostridia</i>                           |                |                      |
| <i>Alkaliphilus metalliredigens</i>         | WP_012065254.1 | 42.0                 |
| <i>Dehalobacterium formicoaceticum</i>      | WP_089611718.1 | 54.0                 |
| <i>Desulfallas gibsoniae</i>                | WP_006522674.1 | 46.5                 |
| <i>Desulfosporosinus orientis</i>           | WP_014185970.1 | 38.6                 |
| <i>Desulfotomaculum ruminis</i>             | WP_013842559.1 | 44.8                 |
| <i>Pseudoclostridium thermosuccinogenes</i> | WP_103081847.1 | 39.9                 |

Groups 1, 2 and 3 have the genomic arrangements around *2dof* in *B. cereus*, *A. acidocaldarius* and *D. gibsoniae*, respectively, in Figure 11A.

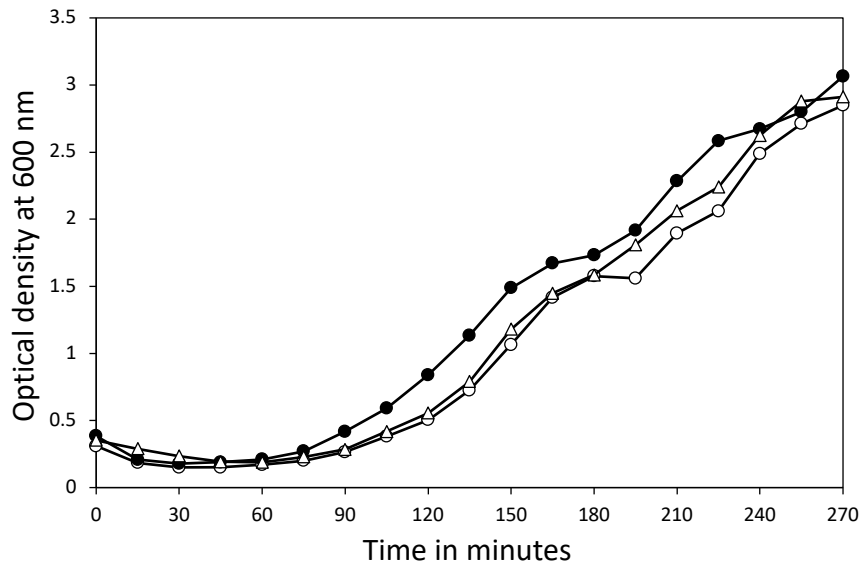

### Supplementary Figure S1

Germination, outgrowth, and vegetative growth from dormant spores of various strains inoculated at  $\sim 10^8/\text{ml}$  in LB medium, incubated at  $37^\circ\text{C}$  and the culture's  $\text{OD}_{600}$  measured. The symbols used are: ○ – PS832; ● – PS4487; and △ – PS4488. A duplicate experiment found that all three strains again gave similar results.

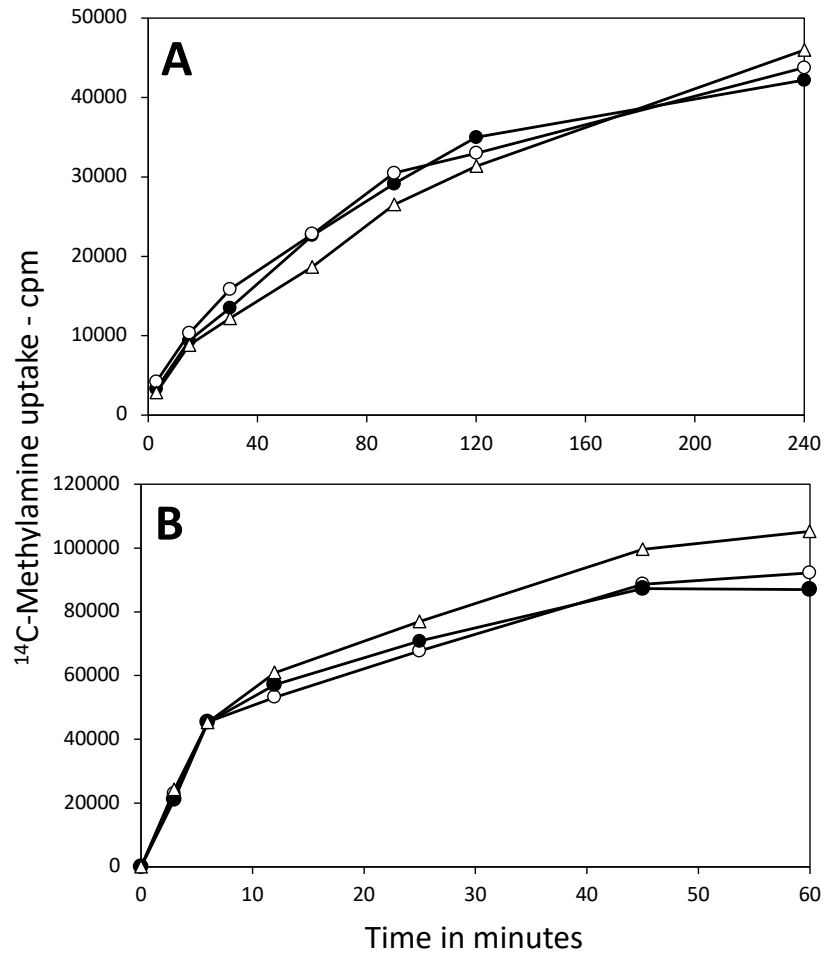

**Supplementary Figure S2**

$^{14}\text{C}$ -Methylamine uptake by (A) intact and (B) decoated spores of PS832 (wt), PS4487 (*ydfS*) and PS4488 (*yetF*) spores.  $^{14}\text{C}$ -Methylamine uptake by spores of various strains, either intact or decoated, was as described in Methods. Symbols used are: ○ – PS832; ● – PS4487; and △ – PS4488. These results were from single measurements in one experiment.



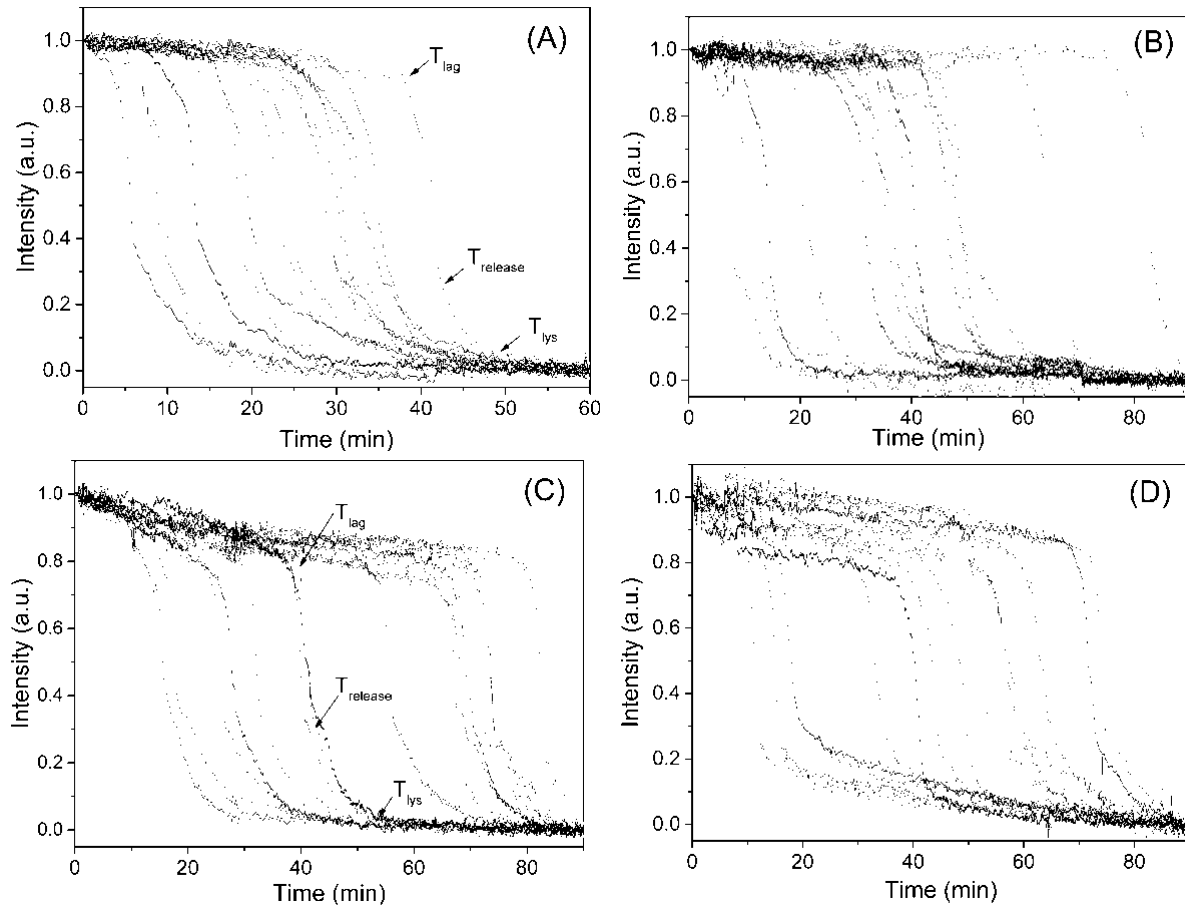

### Supplementary Figure S3

Germination of multiple individual (A,B) PS832 (wt) and (C,D) PS4488 (*yetF*) spores germinating with (A,C) L-valine or (B,D) AGFK. Spores were heat-activated and germinated with L-valine or AGFK and the germination of 16 individual spores of each strain and with each germinant were followed as described in Methods. Arrows on one trace in panels (A) and (C) denote the times of  $T_{lag}$ ,  $T_{release}$  and  $T_{lys}$  and  $I_{lag}$  and  $I_{lys}$  were measured at  $T_{lag}$  and  $T_{lys}$ , respectively.

*sspA*

-35  $\sigma^G$ -10

CAATTTTCAGCTCCTGTATACAATTACCAAAGTTTTTCT**GAATGA**AGCCATGTGTTTTGACAC**CATTCTA**TACTC

**RBS** **TSC**

AC**AAGGAGGTG**AGACAC**ATG**GCTAACA

  

*ykjA*

-35  $\sigma^F$  -10

TGTT**CAGGCG**ATATGCACGTTTCGCCTAGACACTGAT**GCATAG**AGGGCCTGCCACG**GGGCACAAT**AGGCTC

**RBS** **TSC**

AATATGACCAGCGG**ATGGAGGTA**AAGATCG**GTG**TTATGGA

  

*yrbG*

-35  $\sigma^G$ -10

GACGTAAAAGCTTTGT**GAAAT**GCAATCGGTTTTTCTTA**CATAAAT**TGATCATTTTTGTTGCAACCTATAAT

**RBS** **TSC**

GAG**TTGGAGGTG**CATA**ATG**GAAGAGC

### Supplementary Figure S4

Likely promoter sequences for the *ykjA* and *yrbG* genes and comparison with the very strong  $\sigma^G$ -dependent promoter sequence of *sspA*. The *sspA*, *ykjA* and *yrbG* upstream sequences include: -35 and -10 promoter sequences; a GG sequence just upstream of the putative -10 promoter sequence for *ykjA* indicative of a  $\sigma^F$  promoter; the ribosome binding sites (RBS) that were identified based on the optimal *B. subtilis* RBS sequence (AAGGAGGTG) and the translation start codon (TSC). The *sspA* promoter sequences were experimentally determined, and the promoter sequences for *ykjA* and *yrbG* were chosen to give the best matches to consensus  $\sigma^F$  and  $\sigma^G$  promoter sequences, respectively (Wang et al., 2006).

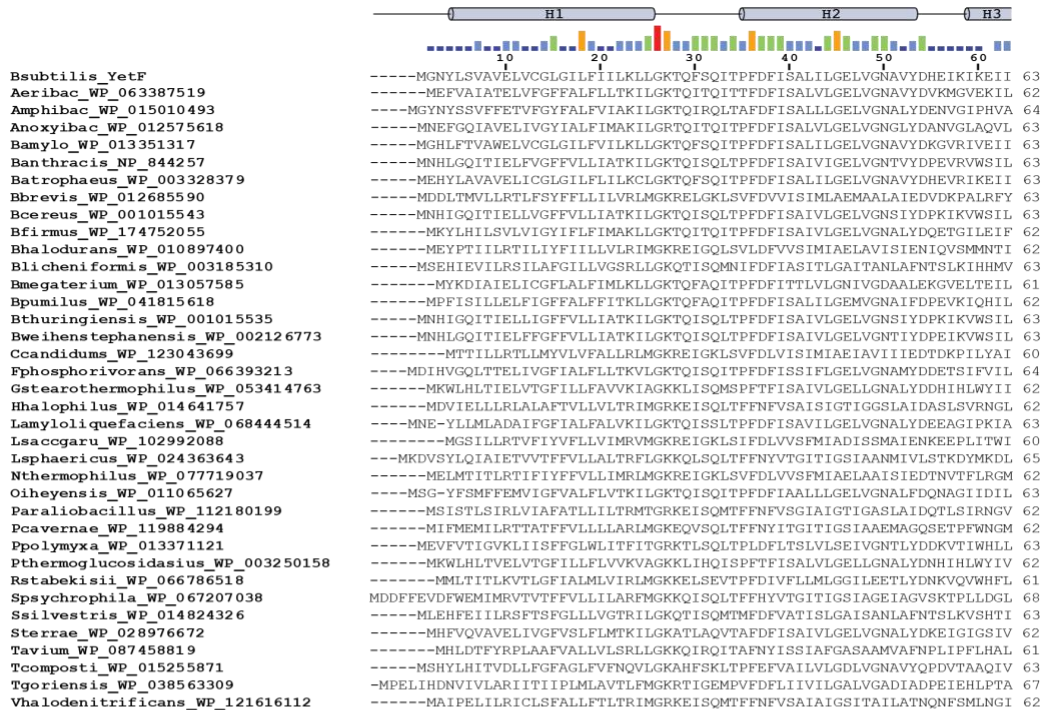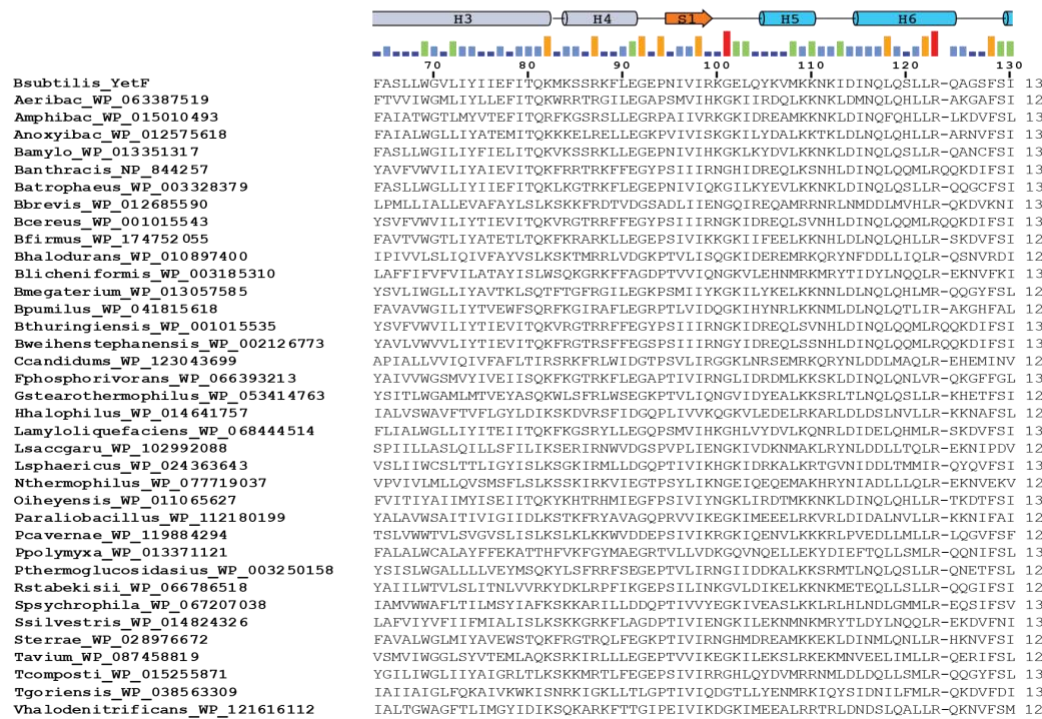

Conservation 30% -100%

**Bsubtilis YetF**  
**Aeribac\_WP\_063387519**  
**Amphibac\_WP\_015010493**  
**Anoxyibac\_WP\_012575618**  
**Bamylo\_WP\_013351317**  
**Banthracis NP\_844257**  
**Batrophaeus\_WP\_003328379**  
**Bbrevis\_WP\_012685590**  
**Bcereus\_WP\_001015543**  
**Bfirmus\_WP\_174752055**  
**Bhalodurans\_WP\_010897400**  
**Blicheniformis\_WP\_003185310**  
**Bmegaterium\_WP\_013057585**  
**Bpumilus\_WP\_041815618**  
**Bthuringiensis\_WP\_001015535**  
**Bweihenstephanensis\_WP\_002126773**  
**Ccandidums\_WP\_123043699**  
**Fphosphorivorans\_WP\_066393213**  
**Gstearothermophilus\_WP\_053414763**  
**Hhalophilus\_WP\_014641757**  
**Lamyloliquefaciens\_WP\_068444514**  
**Lsaccgaru\_WP\_102992088**  
**Lsphaericus\_WP\_024363643**  
**Nthermophilus\_WP\_077719037**  
**Oiheyensis\_WP\_011065627**  
**Paraliobacillus\_WP\_112180199**  
**Pcavernae\_WP\_119884294**  
**Ppolymyxa\_WP\_013371121**  
**Pthermoglucoisidiasius\_WP\_003250158**  
**Rstabekisii\_WP\_066786518**  
**Spsychrophila\_WP\_067207038**  
**Ssilvestris\_WP\_014824326**  
**Sterrae\_WP\_028976672**  
**Tavium\_WP\_087458819**  
**Tcomposti\_WP\_015255871**  
**Tgoriensis\_WP\_038563309**  
**Vhalodenitrificans\_WP\_121616112**

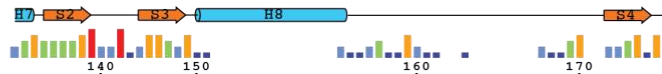

QEVEYAILETNGMVSVLKPSD-----FDKPTNKDLQIPSK-----SVSLP--ITLIID 176  
 REVEYAVLETGTISVLKKS-----FDKPTRNDLNLSS-----PATIP--YTIIVD 175  
 RDVEYAILENDGTISVLNNTS-----SQTPTKDLKLQDE-----KVYLP--VTLIND 177  
 REVEYAILETGTYSVMKAP-----YEQPTRQDHNISAS-----EAVLP--VTVIID 176  
 QEAEYAILETNGMVSVLKFP-----YDTTKNGDMQIKPK-----QVSLP--VTLIID 176  
 REVEYMILEPNNGISVLKKS-----YESPTINDLSLKHK-----PVYLP--ISLISD 177  
 KEAEYAILETNGMISVLKKS-----YDTPKMDVDELAPK-----QVYLP--ITLIID 176  
 ADVEFALLEPTGQMSVFLKEQ---KE-----KVTREDLALMKKLQVGPVSYKGLP--IPLIID 183  
 REVEYMILEPNNGISVLKKS-----YESPTINDLSLKHK-----PVYLP--ISLISD 177  
 REVEYAILETGTYSVAFKKPL-----YATPTIQDLNLPY-----NAELP--VTLIID 175  
 SDVEFAILEPFGKLSVLEKR-----PFSGKSSS-----YLP--LPLIID 166  
 EEVLYAIVETNGTLTVLKKPQ-----FRNVTKKDLVWATTPEG-----KLP--TELIMD 177  
 YEAEYVILETNGEVSVPKHE-----FGPPTKNDLNI PYS-----QTNLP--IALIMD 174  
 NEIEYAILETGDSVSVLPKMK-----YATAEDVNVKKG-----EVKLP--RTFIID 175  
 REVEYMILEPNNGISVLKKS-----YESPTVNDLSLKHK-----PVYLP--ISLISD 177  
 REVEYMILEPNNGISVLKKS-----YESPTINDLSLKHK-----PVYLP--ISLISD 177  
 EDVELAVLEANGKLSVVPKTRNSKETGITQRNVSAAPSQKSETPPKIRYE-----LLP--LPLIID 187  
 REVEYAILESNGSLSILPKYQ-----YGPNNRQDLNLQSQ-----EQPELP--ITLIID 178  
 REVAFCLEADGEISVLKKAH-----YQKTTREDFQLPPH-----PVYVP--VTLIID 175  
 SEVSYAIFETDGLSVMKKTG-----EQPFTKKGDNVVSN-----SPAVYPIPTTVSD 178  
 EEVEYAILEADGEVSVLKKPE-----YQPTIADLNLAPK-----PVKIG--RVLISD 176  
 SDVEFAVLETTGKLSVFPKKE---KR-----PAFKEDVRRDLK-QF-----RMP--IPVIID 173  
 DEIDFAILEPNTLSLILKPP-----FQGTQKIDINISPE-----NPPFLP--IEIISD 179  
 TDVEHAILETSGKLSVILKEG---KQ-----PVTKEEAGVELRGQH-----HLP--VPLIID 176  
 QEVEFAVLEANGKLSVLPKKS-----YQIPTRKDLKMTT-----EVDLS--TTLIND 176  
 NDVDYAI FETDGLSVDKKEK-----VKPLAKT-LQIQN-----KANVEPTPTMIVSD 177  
 QEVYAVLETNGKLSIMKTEE-----AKNPTKSDGLGVAKK-----TPKIP--AAVID 176  
 REVLYATLETNGSLSVMKKE-----YEPAAQDMGIDAQ-----PDLFS--VTVIDK 176  
 REVAFCYLETNGTISVLKKA-----YQKTTREDFQLPPH-----PVHVP--VTLIID 175  
 REVKYVILEPQGQISVMKR-----DSS-DQIT-----TDTLN--RLIIDE 165  
 KDHYAILETNGKLSVILKAG-----LEAATKVDNAAIQ-----VPKYP--TEVIAE 182  
 EEVLFYAIETNGTLTVLKKPQ-----FRNVNKQDLMI PITPEF-----NLP--TELIMD 177  
 REVAFAILETNGSISVKQKQ-----YATPTMEDLQKQK-----PVYLP--ITIIED 175  
 TDVDYAILEPQGQISLILKTK-----HLPASKHVDVETGRA-----NTAPFG--VQIVSD 175  
 REIEYAVLETNGMISVLKRP-----YGPPTRADLGLHG-----GGRVP--ITLIID 176  
 RDVETAI VEPNGALSVLKQK-----KMPATREDLQIQKQ-----PSAIA--FPVIVSD 180  
 KEVDYAI FETSGKLSVMKKN-----KQPATKSDIHQLTTY-----SPKIFP--TEIISD 177

**Bsubtilis YetF**  
**Aeribac\_WP\_063387519**  
**Amphibac\_WP\_015010493**  
**Anoxyibac\_WP\_012575618**  
**Bamylo\_WP\_013351317**  
**Banthracis NP\_844257**  
**Batrophaeus\_WP\_003328379**  
**Bbrevis\_WP\_012685590**  
**Bcereus\_WP\_001015543**  
**Bfirmus\_WP\_174752055**  
**Bhalodurans\_WP\_010897400**  
**Blicheniformis\_WP\_003185310**  
**Bmegaterium\_WP\_013057585**  
**Bpumilus\_WP\_041815618**  
**Bthuringiensis\_WP\_001015535**  
**Bweihenstephanensis\_WP\_002126773**  
**Ccandidums\_WP\_123043699**  
**Fphosphorivorans\_WP\_066393213**  
**Gstearothermophilus\_WP\_053414763**  
**Hhalophilus\_WP\_014641757**  
**Lamyloliquefaciens\_WP\_068444514**  
**Lsaccgaru\_WP\_102992088**  
**Lsphaericus\_WP\_024363643**  
**Nthermophilus\_WP\_077719037**  
**Oiheyensis\_WP\_011065627**  
**Paraliobacillus\_WP\_112180199**  
**Pcavernae\_WP\_119884294**  
**Ppolymyxa\_WP\_013371121**  
**Pthermoglucoisidiasius\_WP\_003250158**  
**Rstabekisii\_WP\_066786518**  
**Spsychrophila\_WP\_067207038**  
**Ssilvestris\_WP\_014824326**  
**Sterrae\_WP\_028976672**  
**Tavium\_WP\_087458819**  
**Tcomposti\_WP\_015255871**  
**Tgoriensis\_WP\_038563309**  
**Vhalodenitrificans\_WP\_121616112**

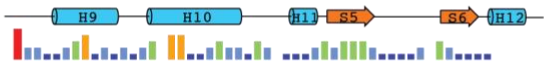

GEIVRDLNKEAGVDEQWLKQELKKNIDKTEDVLF AEWHKKNP-LYTVTYEQSRST 231  
 GEVSENLEKAGFDEKWLQQLLAYSVEDAKDVFYAEWQNNNG-LFVQKY 224  
 GEI EDNLAEINKDKWLYDQIKKQKISSIEEIFYAEYLEDEP-LFIQYM 226  
 GEVIWDLNRENGWDEQWLKKHIRHAGFENYSIDILYAEWQDGGK-MHVQPY 225  
 GEVLYENLEKAGVKEQLIQDLKKNIKRTEDEVFYAEWKHKDP-LFVLPYEEKK 229  
 GKVVKDNLEAGFDEGWLYKQIKKKGITKFEDEVLYAEWKTDDG-FFCQEMDR 228  
 GEVVDNLQEAQVDEWLEWQLQASQVNECKDVLFAEWHAGQP-LFFIKYDSGSDK 231  
 GKVRTEALSQIQNELWLKREIRKYGKIDIREVFSFCSIDE-RGIMYLDKDKDP 235  
 GKVVKDNLEAGFDEGWLYKQIKKKGITKFEDEVLYAEWKTDDG-FFCQEMQR 228  
 GEVVDNLKSNWDETLLKNEIKKYGASGVKDVLYAEWKKGAE-LHVQTY 224  
 GKVQEKHLEKINKTSLWLKQRLKLYRDIKISYCAIKE-DGTFDIDKDEK 218  
 GKMKENLKNLQTLQWQSEMKKRGLSTDEVFYAVLSPD--GNIIYIDYEDHIHSSFDKE 236  
 GKVVPGNLEKANVDEKWLKQLAIKIKKYSEVIFYAEWQQERG-LEITKF 223  
 GEILKDDLQEAQFDETWLSEQLKQHISSYRDLVFCWEIENEG-IYAMKYEKKSHS 231  
 GKVVKDNLEAGFDEGWLYKQIKKKGITKFEDEVLYAEWKTDDG-FFCQEMQR 228  
 GKVVKDNLEAGFDEGWLYKQIKKKGITKFEDEVLYAEWKTDDG-FFCQEMPR 228  
 GQVQDSDLKIKGNRFWLKTRLRQEGIEFRQVFFCSIDH-KGRFYVDRKK 237  
 GELNHNLSLTAAGLNRNKLLEQIHQGYSDIKEVYAEVSEGGK--LLIMPCTKPKK 231  
 GQLLADELAELEKTEQWLAAKIQKQGIASPKDVLIAEWLEGGD-LFVQTYQPAERQRPTRRQTAPE 240  
 GKINDANMQLNLDQKWLHHLQKLSAGVPSISDVFYAEVQKDGK-LYIDKRNITIH 232  
 GEIVWDLNKEASLNKTWLEELHKNQVQSIEDVIFYAEWQENQQLFVALYHTKKKRN 234  
 GKVQEEGLKGLGNRFWLKAEIQKRGKDFKFEVIFYAAVNY-EGRLYIDRKRDRPTR 227  
 GKLLKRNLELVGKNRQWLKDELKMSIENIEEVFYAEIQSNQG-LFIQRY 228  
 GKVDKRLLEIQTFRWLKNEVQKQYKDFKDIFFALYDVSNGLHIDRQK 228  
 GEVIQDNLKELNLSIEWLMEQIKKEGYERIEDVIFYAEYIKDKP-LFLLPYINRHHQKWDVD 236  
 GKI DNNLEKLHLNKNVMMQLESAGVGSIDEVIFYAAVQKDGK-LYIDNTNDTVH 231  
 GNMWTDACHEIQAQKTIIEKQLKDSGYKNLDDVFLVQWQEDGT-LYVDRKTDVQK 231  
 GRLLNESMRGKTI DVELIKAKTREQGYSDIDEIAYAELEDGDT-LHIVPMKEK 228  
 GELLRDELQELKDEQWLNEQLRAYGVTSHQDVFIAEWLEGGD-LFVQTY 225  
 GQIVNRTLNIQIRKNEQVWINLLKKEGYEDIEKVVYAEWSEGGK-LYVQNE 215  
 GKI SKGNLAELNTEEWLFEQLKKGIGNVKTVFFAEVQTDGS-LHVDKMAEGEK 236  
 GEVMMQNLQNNLSEQWLHSELKQNLVQSNVLYAVLSGN--GNMIDTYENHIHSPINKE 236  
 GEVVDNLEKAEGLNEEWLKNLRHHIRSYKDVYFCWEKDKDEG-VFIEKMNANERR 230  
 GQLLTHNLKTIKRDEKLEWQLKQGIPTYKEVIFYAEQEGGG-LYVDRKDKQPY 229  
 GRLQSDNLKGLSEPLWQLADRGITSYEGLVADWDPEEG-LFVMPHQ 226  
 GYIHHDTLTHFKLDEWRLKLAEQNIIGMNIFFASISHPQS-LHISLKERKLNIPPIKH 240  
 GELNEANLKLNLDTNWLNGLQKQAGITSLSEVIFYAEVQPDGT-LYFDNRKDRGLYH 232

Conservation 30% - 100%

## Supplementary Figure S5

Sequence alignment of *B. subtilis* YetF with the best YetF match in other *Bacilli*. Sequence conservation is shown as a bar graph, with red bars indicating identity among YetF homologs. Secondary-structure assignments of YetF from the crystal structure (PDB ID: 3C6F) are shown as blue cylinders (helices) and orange arrows ( $\beta$  strands). Predicted secondary-structure elements by AlphaFold for the N-terminal TM region are shown as gray cylinders ( $\alpha$  helices).



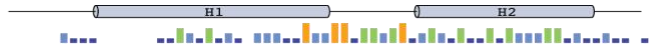

Bsubtilis\_YetF  
 Rcellulolyticum\_WP\_015924636  
 Sglycolicus\_WP\_013625014  
 Sthermophilum\_WP\_011197382  
 Tacetatoxydans\_WP\_013778043  
 Titalicus\_WP\_012994581  
 Tphaeum\_WP\_015049695  
 Tstercorarium\_WP\_015358013  
 Tthermosaccharolyticum\_WP\_015312322  
 Adegensii\_WP\_015739924  
 Adegensii\_WP\_015739458  
 Ametalliredigens\_WP\_012065355  
 Athermocellus\_WP\_003516115  
 Cacetobutylicum\_WP\_010890760  
 Cacetobutylicum\_WP\_010964829  
 Caproiciproducens\_WP\_128742257  
 Carthromitus\_WP\_005805303  
 Cbotulinum\_WP\_011948896  
 Cdesulforudis\_WP\_012303154  
 Cdifficile\_WP\_009889750  
 Clentocellum\_WP\_013658886  
 Cperfringens\_WP\_003472738  
 Csubterraneus\_WP\_009611278  
 Ctetani\_WP\_03511051  
 Dacetoxidans\_WP\_015757363  
 Dformicoaceticum\_WP\_089609402  
 Dgibsoniae\_WP\_006522671  
 Dhafniense\_WP\_011459753  
 Dkuznetsovii\_AEG16849  
 Dorientis\_WP\_014187430  
 Druminis\_WP\_041275606  
 Ibutyriciproducens\_WP\_058117823  
 Lphytofermentans\_WP\_012198749  
 Lumeaense\_WP\_111524166  
 Maustraliensis\_WP\_013780881  
 Mtermoaceticum\_WP\_011391764  
 Psordellii\_WP\_05531643  
 Pthermosuccinogenes\_WP\_103079909

-----MGNYLS---VAVELVCGGLGILFI LKLLGKTPQSPQITPFDFPISALILGELVGNVAHYDHE-I 57  
 ---MN---EGL-----VVVRSLLSFFSLLIFTRILGKQIISQLTFFDFYILGITIGSIAASISDPLS-S 57  
 -----MIIA-----FIRTIILYLIVVIIIRIMGKQIQGLQPFELVILMISLAIAIPSDQIG-I 54  
 ---MG---EVS-----VVIVRSATTFENLLILCRLLGKQVQSQTFFEVVSGITLGSIAELSLTNLS-L 57  
 -----MSILKDLLLHAYKSLILFMVSLTLVRLMGKRTVAQLSPDFVFMIMGSAIAIPLDHD-I 60  
 -----MLIL-----FFRPTLILYALIVIFMRISGKQIQGLQPYELVVAIMADLVAIMQNKQ-I 54  
 ---MTDALLYL---QMALRAVAFIALLIARILEKEHVGSLSLYEYLTGAIATVIGSIAATIAATTMQ-N 60  
 -----MFFDI-----VVKPALMYLVVIVSMRLMGKRMIGELQPFPAIAIMISLAVPLTEGN-T 55  
 -----MLII-----FFRPTLILYFLVVVVMRIMGKQIQGLQPYELVVAIMADLVAVPMQNKQ-I 54  
 ---MN---PFL-----EILLRVAGAFGLVFLITRLVGLSQVQGLTISDVVNGIVIGSIAACLADTIK-E 57  
 -----MSVLG---QVWVRTVLIYFVVLVMMRLMGKREIAQLSPDFFAVAIMIAEVAVLPMSLE-I 57  
 -----MIVI-----FIRAFVLYMIVVIVMRMGKQIAEMQPFELVITIMIADLAATPMENTS-V 54  
 -----MLII-----VVRTLILYLVVIMRIMGKQIQGLQPFELVIAIMISLAVPMQDKR-I 54  
 ---MED---PLI-----NVVRSIVVYLIAFMFLTRLMGRKILSQMTFFDFVGMVSMGSIITDSIVGQK-F 58  
 ---MN---EGL-----VVIVRSIIIGFPTMLIFAKILGKQIISQLTFFDFYILGITIGSIAATITDLS-S 57  
 -----MTIS-----FIRTVLLYAVVILAVRLMGKQIISELQTSSELVVTLISDIASIPMQDGS-Q 54  
 -----MLIV-----LSRTIIIFVWVFFTKMGMKRYIAQLPEYEVVVSIMIAELATLPLEDVS-I 54  
 ---MN---EAL-----VVLVRAIIGFPTLLIFARMLGRQIISQLTFFDFVVLGITIGSTASTLSTDLSE 57  
 ---MN---PFL-----EIVIRAVGAFIALLIARILVGLSQVQGLTISDVVNGIVIGSIAAALADIR-S 57  
 -----MTVV-----LIRSIIILYITVLIARLVMGKQIEAEMNCFDVIITLLIAEVAIVPMENN-I 54  
 -----MEVI-----QAIITALGSAALFTLSKLMGNREMSQSMFDFINSITIGSIAAEMATCE-I 56  
 -----MLIT-----FIRTAIYFIVIIISIRLMGKQIQGLQPYELVITPLMSDLASIPMQDKR-L 54  
 -----MLIL-----FIRTVLLYAVVFMIRISGKQIQGLQPYELVVAIMADLVAIMQNKQ-I 54  
 ---MN---EGL-----VVIVRSIIIGFPTMLIFARVGLGKQVQSQTFFEVVVLGITIGSTASTLSTDLSE 57  
 -----MLLI-----LIRTVLLYLVVIVMRMGKQIQGLQPYELVIAIMADLAIAIPMENTS-V 54  
 -----MET-----VLRVGLLAFGFCYRILMGYRSMGDMPTDFVIMLVIATLTLTGLADES-L 53  
 MLIN---PYI-----EILRALFAYLFLLLFTIRINGREIQSITLYEYVGNITIGSIAAEMATCE-I 56  
 ---MS---EGL-----VVIVRSIIIGFPTLLIFARIIGKQIISQLTFFDFVVLGITIGSMAASATDLS-S 57  
 ---MN---PFL-----QILIRGIGAFGLVFLITRVVGLQVQGLTISDVVNGIVIGSIAAAMVTLK-E 57  
 -----MLIV-----VVRTLILYALVILIALRMLGKREIQGLQPFELVVAIMISLAVPMSVNG-V 54  
 -----MALT-----YVWRTVLIYFVVLVVMRLMGKREIQGLSSDFVVAIILAELAAIPMSSEK-I 55  
 -----MIIA-----FLRTIILYLLIAGIRLMGRQVGELEPSELVLDLIIADLAAVPMQDFQ-I 54  
 -----MTII-----RVLISFASIVALEFLCKFIYGRQMSQMSLFDYINGITIGSIAAEMATDL-E 55  
 -----MNAFL---VAIKLLIGFPAIVIIINSIGKGNLAPSASDQIVNYVVLGGIIGGVYINSS-V 57  
 ---MK---MIA-----EIIQITMAFFAILIFTRILGKQIQGLTETLYDYDINGITIGSIAAGVATDS-Q 57  
 ---MK---FV-----EVLQTLAFLFAILLIYTRILGKQIQGLTFFEVYINGITIGSIAAVALTDPAN 57  
 ---MINEY---IVSISKIIISVSIILFILTIRMGKQIQGLTFLDYVVGISIGSIAAELAINES-I 58  
 -----MLVV-----FVRTLILYAVVIVMRLMGKQIQGLQPFELVVAIISDLAVPMQNTG-I 54

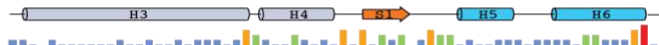

Bsubtilis\_YetF  
 Rcellulolyticum\_WP\_015924636  
 Sglycolicus\_WP\_013625014  
 Sthermophilum\_WP\_011197382  
 Tacetatoxydans\_WP\_013778043  
 Titalicus\_WP\_012994581  
 Tphaeum\_WP\_015049695  
 Tstercorarium\_WP\_015358013  
 Tthermosaccharolyticum\_WP\_015312322  
 Adegensii\_WP\_015739924  
 Adegensii\_WP\_015739458  
 Ametalliredigens\_WP\_012065355  
 Athermocellus\_WP\_003516115  
 Cacetobutylicum\_WP\_010890760  
 Cacetobutylicum\_WP\_010964829  
 Caproiciproducens\_WP\_128742257  
 Carthromitus\_WP\_005805303  
 Cbotulinum\_WP\_011948896  
 Cdesulforudis\_WP\_012303154  
 Cdifficile\_WP\_009889750  
 Clentocellum\_WP\_013658886  
 Cperfringens\_WP\_003472738  
 Csubterraneus\_WP\_009611278  
 Ctetani\_WP\_03511051  
 Dacetoxidans\_WP\_015757363  
 Dformicoaceticum\_WP\_089609402  
 Dgibsoniae\_WP\_006522671  
 Dhafniense\_WP\_011459753  
 Dkuznetsovii\_AEG16849  
 Dorientis\_WP\_014187430  
 Druminis\_WP\_041275606  
 Ibutyriciproducens\_WP\_058117823  
 Lphytofermentans\_WP\_012198749  
 Lumeaense\_WP\_111524166  
 Maustraliensis\_WP\_013780881  
 Mtermoaceticum\_WP\_011391764  
 Psordellii\_WP\_05531643  
 Pthermosuccinogenes\_WP\_103079909

KIKEIIFASLLWGLVLIYIEFTQKMKSSRKFLEGEFNIIVIRKQELQYKVMKKNKIDINGLQSLRRQ 124  
 RSWPHWIGLITWAAGLLLEIYITLKWRYVAKYLENEPTIVIMNGKIMEKTLKMKMFRVSDITPELLRN 124  
 PLSAGLLPVI VLLLLGMTFSYITLSEKARALICGPTTILIEKGGIIEKELVDLRYNLSDLLEQLRV 121  
 RFPWFVGLFAWGGFTLLQVLVAKSRWMAKMLDGEFVILVYRGGIILENLRRLRMSSELAELLRSL 124  
 RLTHGIFPVAITSLNLYLAI IITPKNRKVENILQGTSRILIKDGEVVVSNLKKERITITDLDLVLRE 127  
 PLLSGIIPITLTLVFLVGLFVLSYLSMKSRLARAIICGPTTILIEKGGIILTSQLOKQERYNIDMDELR 121  
 ---PLPLLLALFVFAALTYLVRYFTLKSRAVRKLLAGEPAVVIQNGKIMERTMRRMHHYSTDDLLMLQRT 126  
 NLLHGLLALGVLVLCQPLFLLSILKSLTVRTIICGRPRIVIKNGKIIEKNLKKELYSIINDLEQLRM 122  
 PLLTGTIIPITLTLISQFLFSISMKSLRGREMICGKPTVLIKDKGIITKELQKERYNIDNLEELRV 124  
 NPWYVYVGLAIFASLTILVQVYVLIYRPAKRFLLDEPTVVVHNGRILERNMRRMYNVDLMSQLRE 121  
 PLFRGLLPLLIITVLEIGFSYLSLHRSRWRRLVYGEQPLVWEGKVLHREMRARRYNLDDLLAQLE 124  
 PLINGVITPITLTLSSQVYIISYLSLKSFKFRGLICGKPSILIHKGRIVQSELRRRLINVDLLEQLRS 121  
 PLINGIIPITLTLFAQTTFSPILGKSTRARAIICGRPSILIQNGKINEAELRKMYSVNDLLEQLRI 125  
 TSISSVTALTLSILVIITGYIHIKSLKLEIINSKPIILVDNGNIVEENMKESRITINELLMKIRE 121  
 RAWPHWGLLWALLGLYMEYISTKWRYAGKYLEGEPTIVIMKGIIMEDAMKMNFRATIMELLRL 124  
 PLASGLIPIAALVMEFIVLSVLMKSTKFRKLIICGRPIIVINNGVQQNEMKRLRMTTDELDSEQLRQ 121  
 PLYGIIICITFTILFIEFIIISQILKNIKRLKFLGGKSVILVVDGKFIKENLKNELKLTINDVLELRS 121  
 TAWSHWIGLITWAAGLLLEIYITLKWRYVAKYLENEPTIVIMNGKIMEKTLKMKMFRVSDITPELLRN 124  
 PASFYFLALAVFSGTLFLFLEWSTMKSRPVKRIEDEPTVVVHNGKILETKMNRMYHLLDMLMQLR 124  
 PIINGVAAISGLVMQTLFSLSLKSRKLSFLSGKPSVLDKGIIVYKELKERSIDELLEQLRI 121  
 DLLKPTFAMIVAFNLILSLLTNKSIKIRLATGKPSILYDNGQLYKTFAKAKMLDGELFVQCRV 123  
 PLLLGVPIITLTLVFKLISEIQHRSRLEFEKILDGTSPSIIISDGEINLEMKQRLTMDNIDLEELRS 121  
 PLVAGIIPVITLTLISQVLSYLSMKSRLARV IICGPTTILIEKGGIILTSQLOKQERYNIDNLEELRV 121  
 RAWPHWVALISWAILGYIMQLITLQKRTMAKIDGEPITVIVNGKIMEEALTKMYRAADIQLLRN 124  
 PLANGLVPIFGLLIAQVFIISYAALNKIKFRTIVCGAPSLVKNQQLVESELRRIRYNIHDLLEQLRV 121  
 SLTNTIIAVSTLITLQILFSWTGLKSTFLQLMDGKPIVPIVQNGKILEKNMRRKVRNRSDLMEELRV 120  
 PFGPGLLGMVWTTILPILFGLLVKLSVPARKIIEGEPVIVQNGKIDDEALRQRNTLDDMLMLRQ 126  
 RAWPHWVALITWAALGVVMEKIIKWRYAAKFLGEPVIVVMSGKIMDDALRKNRYISLMLGLLRN 124  
 NGWYAFGLLLFGLLTVISEYASLKYRPLRKLIEGEPVIVHNGKILENNMKKLIYVVDLMLQLR 124  
 PMLSGVPIPLVLSASLTAWISLSEKARNIICGKPSILIDRGIISQDELKRNKYNITDLEELRL 121  
 PIWHGIVPATLGLLEVTFSYLLTLNRLPRKIVYGSQV IIEGKLLKHEMRSSRYNLDLDSQLRE 122  
 PLLSGIIPITLTLVSMVLSVLTMSKRVKFRVAVCGRPSIIVENGRNQEMRRNRFVDAELNEELRV 121  
 NPLHALIAMAISVVAVLSIGTDKWLGSFRVNGYPLVLLDNKLDLYENFKKAKIDIEEFQICQRN 122  
 RILDFIAILCIWILVLGLKWKITHNVKAKLIDGKALTIIDGGKIIVENCKAGLSAHDVDFKLR 124  
 RTRQHLMLGLALFALLTFLMSYISMKSRPARKLIEGEPITVIVNNGIILENLRKMHYNIIDLISELRQ 124  
 QTWMLFLGLTFLFAFTLWAGYAVLVSRAKLIISGEPVIVVHNGKILEENMKMRYNDELAMQLRQ 124  
 SYIQGITGMTIYALFPIILLSFISLKSHLARKILDGVTPIIQNGEINEKGLKTKMNIINDLEELRL 125  
 PLVNGIIPITLTLIAQALMSLISLKSVAKARGIICGKPSILIEKGINESVLRREMYNIDLLEQLRS 121

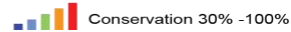

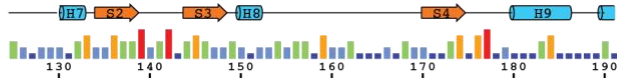

|                                     |                                                                       |     |
|-------------------------------------|-----------------------------------------------------------------------|-----|
| Bsubtilis_YetF                      | AGSFSIQEVEYAILLETNGMVSVLKPSDFDKPTNKDLQIPKSVSLPITLIIIDGGEIVRDLNKEAGVDE | 191 |
| Rcellulolyticum_WP_015924636        | KDIFDLTEVDFAIIEENPGQLSVLKKPEYQNLTPKDMYIQKASGISSELIYDGIIEENLRQLDKDK    | 191 |
| Sglycolicus_WP_013625014            | NNIPNIADVEYAILLETNGQLSVIPKTDKRLPTADMMIHPAYEGLPSILIMDGIQVKNRLESNANL    | 188 |
| Sthermophilum_WP_011197382          | QSVFHFDEVEVLAVLEPRGTLVSLRTADTQVPTPADLGI PASSRGLGIELVVDGEMDQNLRLRGLVNR | 191 |
| Tacetatoxydans_WP_013778043         | KDVTNINEVEEAAIEENPKGLSVIKKYMVTPTPRDLGLWSNQGIFPTLVIDGGEVIQDNLDRVGSVI   | 194 |
| Titalicus_WP_012994581              | KGYPNIADVEYAILLETNGLSVLPKSKDRPVTQDNLTPQYEGPLPIIIDGRIMHQMQKAGIDM       | 188 |
| Tphaeum_WP_015049695                | KGVFNISDVEFAVVEPNGLSVLKLKQKMPVTREMQIPSYRGISSELIYDGEVIYQNLQRNLDL       | 193 |
| Tstercorarium_WP_015358013          | LNIQNISDVEYGILETNGQLSVLKSQKRPVTPEDLGIETKYEGLSLDIIIDGIVITHNLKLAKLDM    | 189 |
| Tthermosaccharolyticum_WP_015312322 | MGYPNIADVEYAILLETNGLSVLPKSKDRPVTNDLMLTPQYEGPLPIIIDGKIHKNMKMANVDM      | 188 |
| Adegensii_WP_015739924              | KGYPNLADVEFAIVEPNGLSVLPSKQKRPVTPEDLGLPTKYEGLVPSSELIYDGGIYQNLVQNNLTK   | 191 |
| Adegensii_WP_015739458              | KGYPHDPSEVACAVLESSGRLSVIPRSEYRPLTRDGLPPVPGVVRVLVADGEEILEENLKVGVDR     | 191 |
| Ametalliredigens_WP_012065355       | KEYLNLSDVEYAILLETNGLSVIMPKDKRGTITSDLAVAVQEELEPVTLIIIDGKVNQNLKRAQMD    | 188 |
| Athermocellus_WP_003516115          | KNINYIADVEFAILETNGQLSVIPKSKDRPVPSEDLNIPKYEGLSLDIIIDGGEVISHENLKLANDLV  | 188 |
| Cacetobutylicum_WP_010890760        | KNIFNMADVEFAIIEIDGQLSVLPKASQKPLTPSNMNIHVSTGLTQDIIIDGNIIDENLYKAGLDI    | 192 |
| Cacetobutylicum_WP_010964829        | KDVFNLADVEFAIIEPNGLSVLKKPELQVPTCDMMNITKNEMGIETELIYDGIIEENLRQLNKT      | 191 |
| Caproiciproducens_WP_128742257      | KNVFSIQDVAIVAVETNGKMSVLPKDKPEQPTAGMLAVPLPDTGIEYVSDGVIISDFSLQKCKSA     | 194 |
| Carthromitus_WP_005805303           | GGNYDLSKIGFAILERSNGKIAVLPKNNEN-----EKVYLPSTIIIDGGEVKEGLKVINRNN        | 177 |
| Cbotulinum_WP_011948896             | KDIFDLKQVFAVLESDGQLSVLKKPEEPLTAKDLNIPKSKTISRELIYDGEVIEDNLRKINRDK      | 191 |
| Cdesulforudis_WP_012303154          | KGVPNIADVEFAVLEPNGLSVLKSQKRPVTPADLQPLTPRYEGMPELIVDGTVEIENLQINLNDL     | 191 |
| Cdifficile_WP_009889750             | QGYFNLKDVQYAILETNGNLSVVPASSYNSVTPPR-----AFNHLPIPLIDGRIINKNLIDIAQKDT   | 182 |
| Clentocellum_WP_013658886           | NDYFDLDTIQTALLEPNGKISFLPVSNNKRPITGDELNIPSPQNYLVANVIIDGKIMLQNLKIHGNE   | 190 |
| Cperfringens_WP_003472738           | AGYLDISDIQYAIETNGTISIIIPKACDNVKKRDLKIKESSEKIPIVLFEDGRNLKQGMNKDE       | 188 |
| Csubterraneus_WP_009611278          | KGYPNIADVEYAILLETNGLSVLPKSKDRPVTQDNLTPQYEGPLPIIIDGRIMHQMQKAGIDL       | 188 |
| Ctsetani_WP_035111051               | KDIFDLKQVFAVLEPNGLSVLKKPEEPLTQDMMNIPSPSPDISIEVIYDGLIIEHLKWFKNLTK      | 191 |
| Dacetoxidans_WP_015757363           | KNIANIADVEFAILETNGKLSVLPKSKRPLIPEDLQISTKYEGIPTTLIIDGQIMSNLNRIMIKLDE   | 188 |
| Dformicoaceticum_WP_089609402       | QGLSNYLDVEFAVLEPSGRFSIIRKKEVEPIPTPRYL-----KTSKTIEMENGEIFADQLTQSGVTA   | 182 |
| Dgibsoniae_WP_006522671             | KDIFNLGDNVAIFERNGELTVQRKSQLNPVTPADLNIITSLYQGLPPTLVQDGVVIEENLKEISLKS   | 193 |
| Dhafniense_WP_011459753             | KGIFDVSQVDFALLEPNGQLSVLQKPNELPLTPKDMNIPKSSSGISSELIYDGMIVQNLKRFKDK     | 191 |
| Dkuznetsovii_AEG16849               | KNVFNADVEFAVFAEENGLSVLKLKSHKQPLTPSDMQIPTRKQGISSELIYDGVVYQNLKQNNLTK    | 191 |
| Dorientis_WP_014187430              | NNMPNIADVEFAILENNGQLSVIPKTKRPTIPDDFKISPPQYEGPLTVIMDGKLNKKNLEHYNKDI    | 188 |
| Druminis_WP_041275606               | KGYPNMEDVEYAILETSGKLSVIPRSQKRPVTPEDLGIPTPYEGLPTVLVMDGDVLEENLQKVNLT    | 189 |
| Ibutyriciproducens_WP_058117823     | QGITDLSVTKYAILETNGRVSIPYANQRVPTAEQNNLFPDDVGLPLVIINDGRLEHLNKLKRGFNE    | 188 |
| Lphytofermentans_WP_012198749       | CGYFDITTIQTALLEPNGTIVSLPKATHRPAATPKDLSIKAPQDYVMFNLVDGIMIVSNLKLIDLDE   | 189 |
| Lumeaense_WP_111524166              | NRIYSTKDKVRAVLENGQLLILQSG--EENPK-----FVITDQGVQSDILEVIKDE              | 176 |
| Maustraliensis_WP_013780881         | KDVFNLKDVKYAILEPNSGLSILQNAIKPLTPKDMNIPSPQQLPSELIVDGGIYQNLQANNLNG      | 191 |
| Mtermoacetica_WP_011391764          | KNVFDIADVEYAIEMEPDGLSVLKLKSHKQPLTPSDLKLSTKYEGLVPTTELIEDGELFQNLQRNLDL  | 191 |
| Psordellii_WP_055331643             | KDVFDIKDKFAILETNGLSIQLKSKHPLTPEDINLKLKDKYLCVNIIDGKILDNHLEIIGKDI       | 192 |
| Pthermosuccinogenes_WP_103079909    | KDIYNIADVEYAILLETNGQLSVLPAQKRPVTPADLQIPKSVSLPITLIIIDGGEIVRDLNKEAGVDE  | 188 |

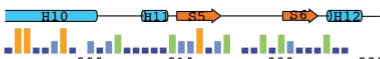

|                                     |                                                                |     |
|-------------------------------------|----------------------------------------------------------------|-----|
| Bsubtilis_YetF                      | QWLKQELK-KKNIDKTDVLFVAEWH-KNKPLYTVTYEQSRST                     | 231 |
| Rcellulolyticum_WP_015924636        | NWLLNELK-KQGITDIDSVFIATLN-PSGSLYIDLNDYDHMTK--ITDIGDY-KG----PY  | 242 |
| Sglycolicus_WP_013625014            | TWLKNELN-KANL-KVNDVLIASLD-NQNHLYFQAKKS-----NS                  | 225 |
| Sthermophilum_WP_011197382          | TWLMKALK-EQGIRSPAEFLAVVD-ADGKLYVDRYTRDVPK--SHDLSDY-PG----PN    | 242 |
| Tacetatoxydans_WP_013778043         | DLMLRQLN-QKIGRLKEVKSAMID-EDGNLSIERVTETTSK                      | 234 |
| Titalicus_WP_012994581              | EWLNEQLK-MWKIQNVKEVLFASLD-TNKVLTVYRKED                         | 224 |
| Tphaeum_WP_015049695                | AWLISELA-KQGIKSPREVMLAGLD-TQGNLYVDRKQDQRH--VVQVRDD-PG--E       | 243 |
| Tstercorarium_WP_015358013          | DLVVGLKL-ENGWDPNPRDIFAYID-TAGNFQYQPKLKASKSRVMNTP               | 235 |
| Tthermosaccharolyticum_WP_015312322 | KWLNQQLK-MWNVNINIENIILASLD-PNKVLTVYKKE                         | 223 |
| Adegensii_WP_015739924              | EWLLKELE-KQGVKSLKEVLYASLD-SEGKLYIDKQDKLEH--LTDVTDKLPG--QSQQ    | 245 |
| Adegensii_WP_015739458              | EWLLRELE-KQGFREPEKVFATLS-PQGLFVSPKEEEGELPN                     | 234 |
| Ametalliredigens_WP_012065355       | SWLLKQTE-NEGIKGLHNVFAFIS-SEGNFHAQEAKK                          | 224 |
| Athermocellus_WP_003516115          | NWLNDTLS-KFGINNPDKVLLASLD-SEGKLYLQKERRNN                       | 227 |
| Cacetobutylicum_WP_010890760        | DWLLSQLN-SQNIKNSEVVFYAGID-NTKKLYVSKKARKNTKY                    | 233 |
| Cacetobutylicum_WP_010964829        | DWLFKVLK-SRGIKNSEVFLATLN-PGGSLYIDLKDHK--VLDIGDY-KG----PY       | 242 |
| Caproiciproducens_WP_128742257      | DWLQGVLN-GQHLQAG-EIFLMTAN-TKGDFFIVKREAPK                       | 225 |
| Carthromitus_WP_005805303           | DWLMKQLK-ENKIKSPKDVLYAYTD-SNGTFKYQLETK                         | 213 |
| Cbotulinum_WP_011948896             | EWLKAEK-KRNKDSSDVFLATIN-ENNQIYIDTYKDLKRR--IIDIGDY-KG----PY     | 242 |
| Cdesulforudis_WP_012303154          | EWLYRELE-KQGVRSSEVMYASLD-SEGKLYVDLKEDAIEH--YTDITDKVPD--KIQ     | 245 |
| Cdifficile_WP_009889750             | NWLMGILK-SNHIEYFKDVLICVLD-ENDKIFIQNKGD                         | 219 |
| Clentocellum_WP_013658886           | KWLTQQLR-IHDVSDIEVFLATCD-RNNKLCVYKLLTEKMTADLLE                 | 235 |
| Cperfringens_WP_003472738           | KWLDEKLR-SLNYSPRDKLFLVMD-SNGKLFYQKRNKQDKEDIIL                  | 232 |
| Csubterraneus_WP_009611278          | AWLDEQLK-IWNIKSVEVLFASLD-SNKVLTVYKKEG                          | 224 |
| Ctsetani_WP_035111051               | KWLKELK-KRNINDPSEVFLATMD-TNGFYADKYNDLMMKENVTDKGTY-KG----PL     | 244 |
| Dacetoxidans_WP_015757363           | NWLERELA-KFGIDSHQVLFASLD-TNGKLFQWLKSD                          | 224 |
| Dformicoaceticum_WP_089609402       | AELAEILE-SFHIDDLNQLSIVIT-PDGHIALTKKQQ                          | 218 |
| Dgibsoniae_WP_006522671             | DWLLKQLQTEHGVEISQVIAQLD-TSGNLYVDLKNANPEN--KPH                  | 237 |
| Dhafniense_WP_011459753             | KWLQKELQ-KQGIKDVSEVFFASLD-PAGSLYIDLKDRQLN--PVDIGDY-KG----PY    | 242 |
| Dkuznetsovii_AEG16849               | DWLYRELE-KQGIKSVKDVYASLD-AEGKLYVDRKEDTMQH--VTDITDKLPD--KMPQ    | 245 |
| Dorientis_WP_014187430              | QWLKELK-KQKIQIEVDVFIASLD-SSGNLFAQEKQPKKQKNNKKNPDR              | 240 |
| Druminis_WP_041275606               | AWLKEKLA-ERGFH-PKVVLLATLN-TNGQLLIDCQNDDRQK                     | 228 |
| Ibutyriciproducens_WP_058117823     | GWLNKRLK-EHGVRAVDFVLLSVD-EQNRVYFVPEVGVK                        | 227 |
| Lphytofermentans_WP_012198749       | DWLIKQLK-SQGVNDYHELLVTCN-HKHEITAYKRYKKNHAS                     | 230 |
| Lumeaense_WP_111524166              | DWLEELK-KQGIKYSVDFLGEYV-NNSLILITDK                             | 210 |
| Maustraliensis_WP_013780881         | KWLMMLA-AHDHISKEVAYASIDPLTKFVYDVTYKDSVPK--NIDISVYK--KLE        | 245 |
| Mtermoacetica_WP_011391764          | KWLIQQLQ-AQGIQIDVQVAVLR-SNGTLYNVTKEDDIIN--PVDITDAPESPVTKEEQDRP | 253 |
| Psordellii_WP_055331643             | KWLNSELD-KKGIKNTSDILLAYMD-SSKLNLYKNDIPITPTL                    | 236 |
| Pthermosuccinogenes_WP_103079909    | NWLKSELA-KHGISDARDVLFASLD-SSGNLFLQKREK                         | 224 |

Conservation 30% -100%

## Supplementary Figure S6

Sequence alignment of *B. subtilis* YetF with the best YetF match in *Clostridia* species. Sequence conservation is shown as a bar graph, with red bars indicating identity among YetF homologs. Secondary-structure assignments of YetF from the crystal structure (PDB ID: 3C6F) are shown as blue cylinders (helices) and orange arrows ( $\beta$  strands). Predicted secondary-structure elements by AlphaFold for the N-terminal TM region are shown as gray cylinders ( $\alpha$  helices).



*Clostridia*

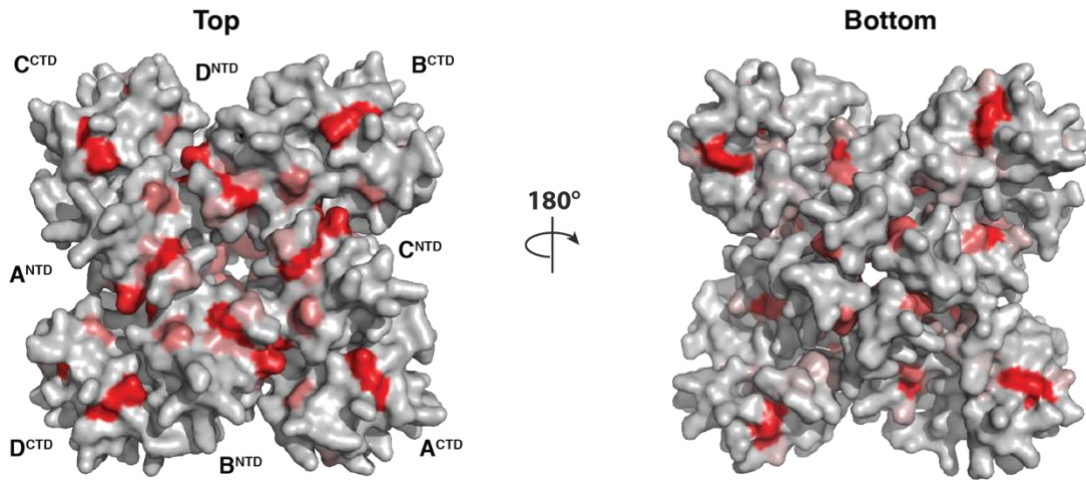

**Supplementary Figure S7**

Surface representation of a tetrameric YetF, showing conservation among best matched YetF homologs identified in *Clostridia* species.
